# Supplementary material
Source: MDPI journal article supplement (https://www.mdpi.com/1424-8247/15/2/157)
Supplement: s1 [file s1]

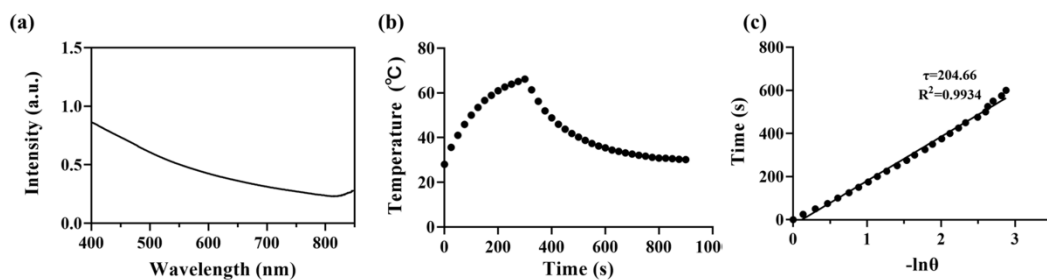

**Figure S1.** characterization of GQDs. (a) UV-Vis-NIR spectrum of GQDs. (b) Photothermal effect of GQDs solution (300  $\mu\text{g/mL}$ ) exposed to the NIR laser (808 nm, 1.44  $\text{W/cm}^2$ ). The lasers were shut off after 300 s irradiation. (c) Plot of cooling time versus negative natural logarithm of the temperature driving force obtained from the cooling period after the NIR irradiation (808 nm, 1.44  $\text{W/cm}^2$ ).

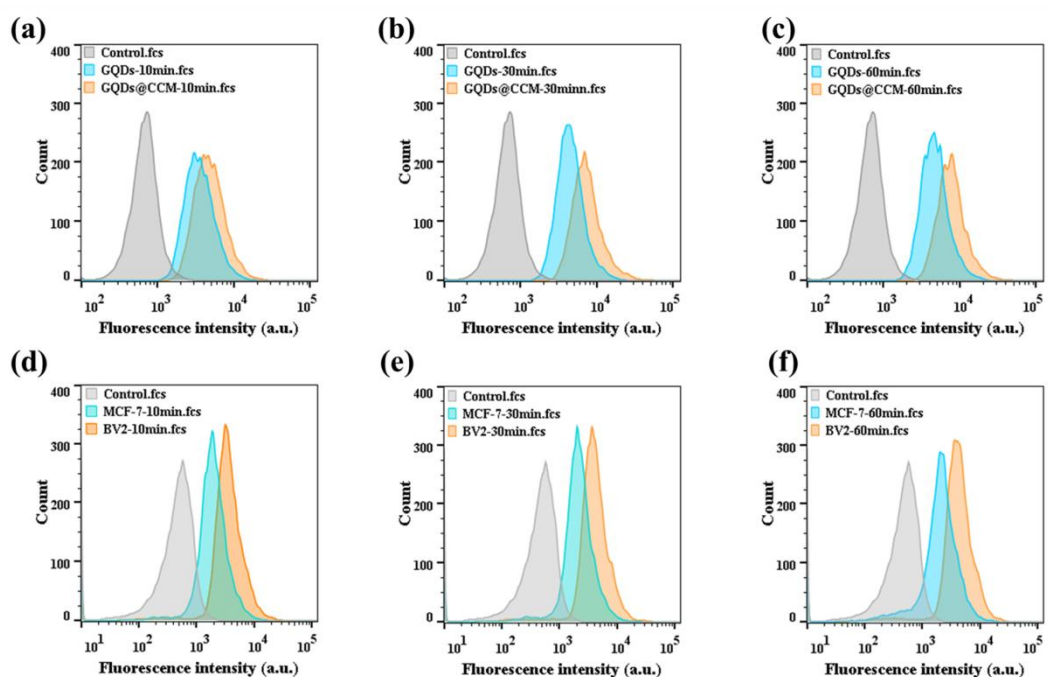

**Figure S2.** Flow cytometry analysis. (a, b and c) Mean fluorescence intensity of BV2 cells after 10, 30, and 60 min incubation with GQDs or GQDs@CCM, the final concentration of GQDs were 200  $\mu\text{g/mL}$ . (d, e and f) Mean fluorescence intensity of MCF-7 and BV2 cells after 10, 30, and 60 min incubation with GQDs@CCM, the final concentration of GQDs were 200  $\mu\text{g/mL}$ .

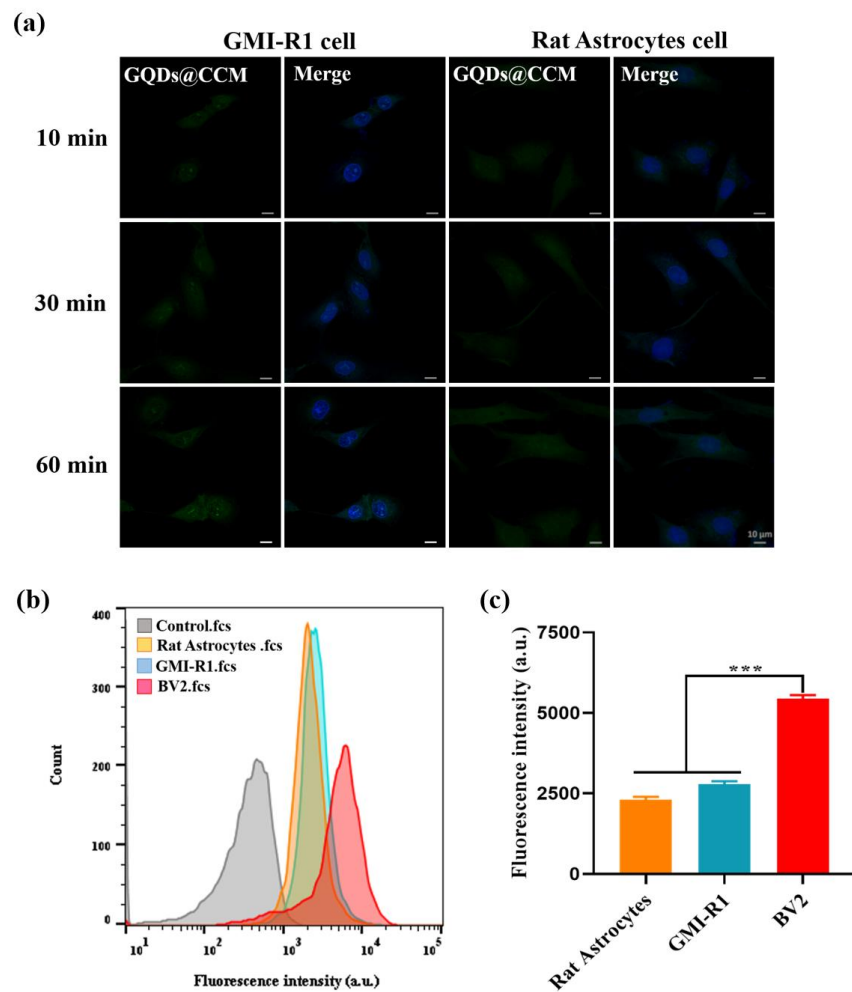

**Figure S3.** Homologous targeting of GQDs@CCM. (a) CLSM images of GMI-R1 and Rat astrocytes cells incubated with GQDs@CCM at GQDs concentration of 200  $\mu\text{g/mL}$  for different time period. Scale bar = 10  $\mu\text{m}$ . (b,c) Quantitative analysis of cell uptake by FCM in different cell lines.
